# Supplementary material for: Early Postnatal Cardiomyocyte Proliferation Requires High Oxidative Energy Metabolism
Source: PubMed Central journal article supplement (PMC5684334; doi:10.1038/s41598-017-15656-3), 2017-11-13
Supplement: 41598_2017_15656_MOESM1_ESM.pdf [file 41598_2017_15656_MOESM1_ESM.pdf]

## **Early Postnatal Cardiomyocyte Proliferation Requires High Oxidative Energy Metabolism**

**Ana Elisa Teófilo Saturi de Carvalho<sup>1</sup>, Vinícius Bassaneze<sup>1</sup>, Maria Fernanda Forni<sup>2</sup>, Aline Alfonso Keusseyan<sup>1</sup>, Alicia Juliana Kowaltowski<sup>2</sup>, José Eduardo Krieger<sup>1\*</sup>**

<sup>1</sup> Laboratory of Genetics and Molecular Cardiology/LIM 13, Heart Institute (InCor- HCFMUSP), University of São Paulo Medical School, São Paulo, Brazil.

<sup>2</sup> Departamento de Bioquímica, Instituto de Química, Universidade de São Paulo, Brazil.

\* Correspondence to Jose E. Krieger, Genetics and Molecular Cardiology/LIM 13, Heart Institute, University of São Paulo Medical School, Av. Dr. Enéas C. Aguiar 44, 05403-000, São Paulo, SP, Brazil. <http://genetica.incor.usp.br/>

Telephone: 55 11 3069 5068; Fax: 55 11 3069 5022

E-mail: [krieger@incor.usp.br](mailto:krieger@incor.usp.br)

# Mitochondrial / gDNA

Cell culture

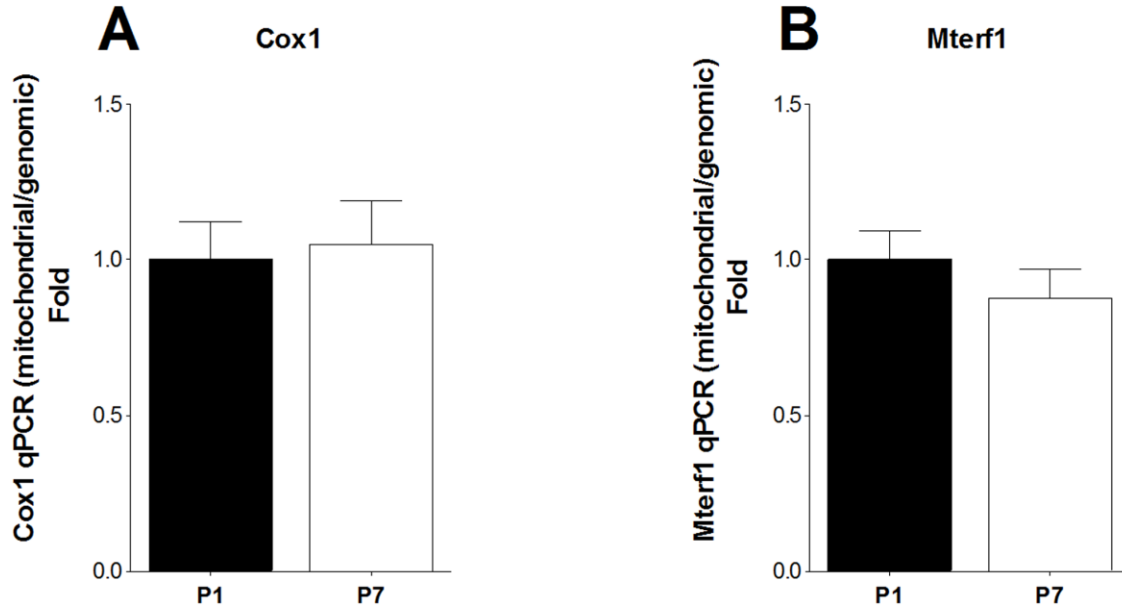

**Supplemental Figure 1:** Mitochondrial DNA quantification for Cox I and Mterf1 genes as a measure of mitochondrial content in cell cultures (P1 vs. P7; (n = 6 for both); t-test, NS). Data is normalized to genomic DNA.

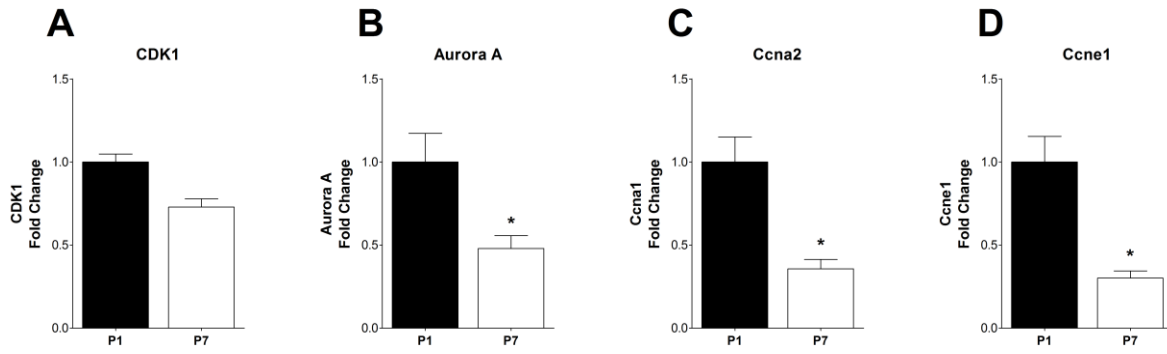

**Supplemental Figure 2:** Expression profile of genes related to proliferation in P1 vs. P7 tissues. A) Cdk1, B) Aurora A, C) Ccna2 and D) Ccne1. Fold change  $\pm$  SD, \*  $p < 0.05$ ).

**Supplemental Table 1:** List of all primers used in this study. For primers used in RT-PCR experiments, at least one intron between each pair of primers was considered to avoid genomic DNA amplification.

| Primer       | RefSeq ID                      | Primer Sequence       | Tm (°C) | Amplicon Size |
|--------------|--------------------------------|-----------------------|---------|---------------|
| r Aldoc Fw   | <a href="#">NM_012497.1</a>    | GAATGGTATCGTGCCCATCG  | 60      | 211           |
| r Aldoc Rev  |                                | GGCGATCTCTTCTGGGCTAT  |         |               |
| r Lrrk2 Fw   | <a href="#">NM_001191789.1</a> | AGCTGTCCTACTCTGGGAGG  | 60      | 204           |
| r Lrrk2 Rev  |                                | ACCCCAAACCAGCATGACA   |         |               |
| r Ndufv3 Fw  | <a href="#">NM_001101011.2</a> | TCTCGAGGCAAAGGTGTTCC  | 60      | 157           |
| r Ndufv3 Rev |                                | GTAGGTGGTGGTGCTACTCG  |         |               |
| r Ucp2 Fw    | <a href="#">NM_019354.3</a>    | CTTGATCTTGAGGCCCTCAGC | 60      | 138           |
| r Ucp2 Rev   |                                | TCTGACTTCCTGCTACCTCCC |         |               |
| r Ccne1 Fw   | <a href="#">NM_001100821.1</a> | CCTCTCAGTCCGATCCAGAAA | 60      | 172           |
| r Ccne1 Rev  |                                | TTTGTTAGGGGTGGGGATGA  |         |               |
| r Ccna2 Fw   | <a href="#">NM_053702.3</a>    | CCTGCATTTGGCTGTGAACT  | 60      | 141           |
| r Ccna2 Rev  |                                | AACTCTGCTACTTCTGGGGG  |         |               |
| r Aurka Fw   | <a href="#">NM_153296.2</a>    | GTATTTCCATGACGCCACCA  | 60      | 140           |
| r Aurka Rev  |                                | ACAAAGCATTCGCCAACTCC  |         |               |
| r Actb Fw    | <a href="#">NM_031144.3</a>    | TCTACAATGAGCTGCGTGTG  | 60      | 76            |
| r Actb Rev   |                                | TTGGCCTTAGGGTTCAGAGG  |         |               |
| r Cox1 Fw    | NC_001665.2                    | TGCTGGAGCATCCGTAGATT  | 60      | 63            |
| r Cox1 Rev   |                                | AAGATAGAAGACACCCCGGC  |         |               |
| r Mterf1 Fw  | NC_005103.4                    | CTGCTCTGTTGGGTTGACTC  | 60      | 75            |
| r Mterf1 Rev |                                | AGACTGTTGGAGAAGGTCCTG |         |               |
